# Supplementary material for: Hydrothermal synthesis, crystal structures, and X-ray photoelectron spectroscopy of lead tellurium(iv) and tellurium(vi) oxycompounds: Ba3PbTe6O16and Na2Pb9(μ6-O)2(Te2O10)2
Source: Royal Society of Chemistry journal article supplement (doi:10.1039/d1dt00566a), 2021-01-01
Supplement: d1dt00566a1.pdf [file d1dt00566a1.pdf]

## Supporting Information

### Hydrothermal Synthesis, Crystal Structures, and X-ray Photoelectron Spectroscopy of Lead Tellurium(IV) and Tellurium(VI) Oxycompounds: $\text{Ba}_3\text{PbTe}_6\text{O}_{16}$ and $\text{Na}_2\text{Pb}_9(\mu_6\text{-O})_2(\text{Te}_2\text{O}_{10})_2$

Han-Yin Li<sup>a</sup> and Kwang-Hwa Lii<sup>\*,a,b</sup>

<sup>a</sup>Department of Chemistry, National Central University, Zhongli, Taiwan 320, R.O.C.

<sup>b</sup>Institute of Chemistry, Academia Sinica, Taipei, Taiwan 115, R.O.C.

Figure S1. Energy dispersive X-ray spectroscopy analysis on a crystal of  $\text{Ba}_3\text{PbTe}_6\text{O}_{16}$ .

Figure S2. Pawley fit of the powder diffraction data to the structure of  $\text{Ba}_3\text{PbTe}_6\text{O}_{16}$ .

Figure S3. Energy dispersive X-ray spectroscopy analysis on a crystal of  $\text{Na}_2\text{Pb}_9(\mu_6\text{-O})_2(\text{Te}_2\text{O}_{10})_2$ .

Figure S4. Pawley fit of the powder diffraction data to the structure of  $\text{Na}_2\text{Pb}_9(\mu_6\text{-O})_2(\text{Te}_2\text{O}_{10})_2$ .

Figure S5. The infrared spectrum of  $\text{Ba}_3\text{PbTe}_6\text{O}_{16}$  (KBr method).

Figure S6. The infrared spectrum of  $\text{Na}_2\text{Pb}_9(\mu_6\text{-O})_2(\text{Te}_2\text{O}_{10})_2$  (KBr method).

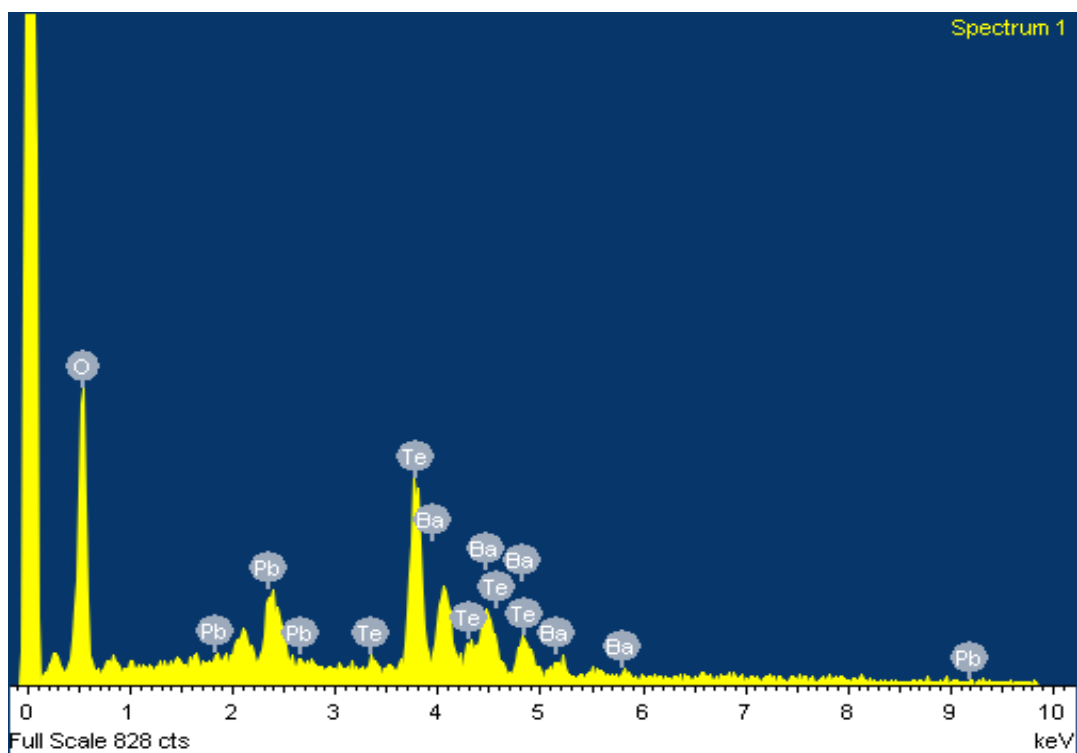

## EDS

| Spectrum   | O     | Ba   | Te     | Pb   |
|------------|-------|------|--------|------|
| Spectrum 1 | 70.96 | 8.56 | 17.38  | 3.1  |
| Spectrum 2 | 69.76 | 8.86 | 18.23  | 3.14 |
| Mean       | 70.36 | 8.71 | 17.805 | 3.12 |

Atomic%

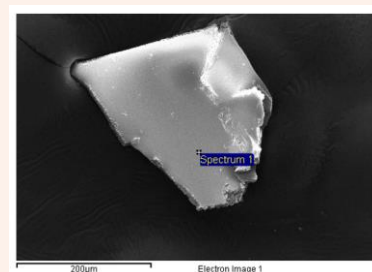

Figure S1. Energy dispersive X-ray spectroscopy analysis on a crystal of  $Ba_3PbTe_6O_{16}$ .

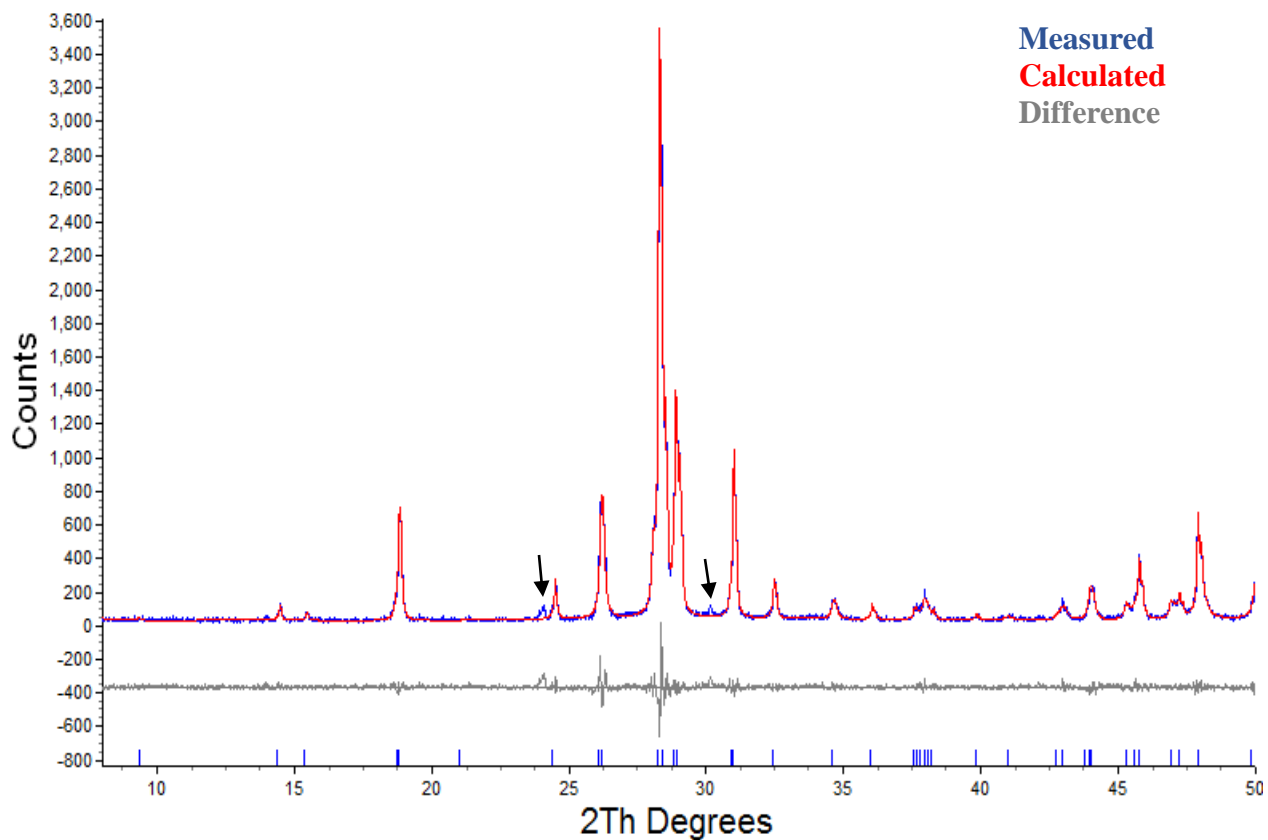

|                        | Value |
|------------------------|-------|
| GOF                    | 1.42  |
| Rexp                   | 9.64  |
| Rwp                    | 13.70 |
| Rp                     | 9.62  |
| Rexp-dash              | 1.10  |
| Rwp-dash               | 1.56  |
| Rp-dash                | 1.86  |
| Weighted Durbin Watson | 1.28  |

Figure S2. Pawley fit of the powder diffraction data to the structure of  $\text{Ba}_3\text{PbTe}_6\text{O}_{16}$ . The small peaks marked with an arrow correspond to the impurity  $\text{Ba}_3\text{Te}_4\text{O}_{11}$ .

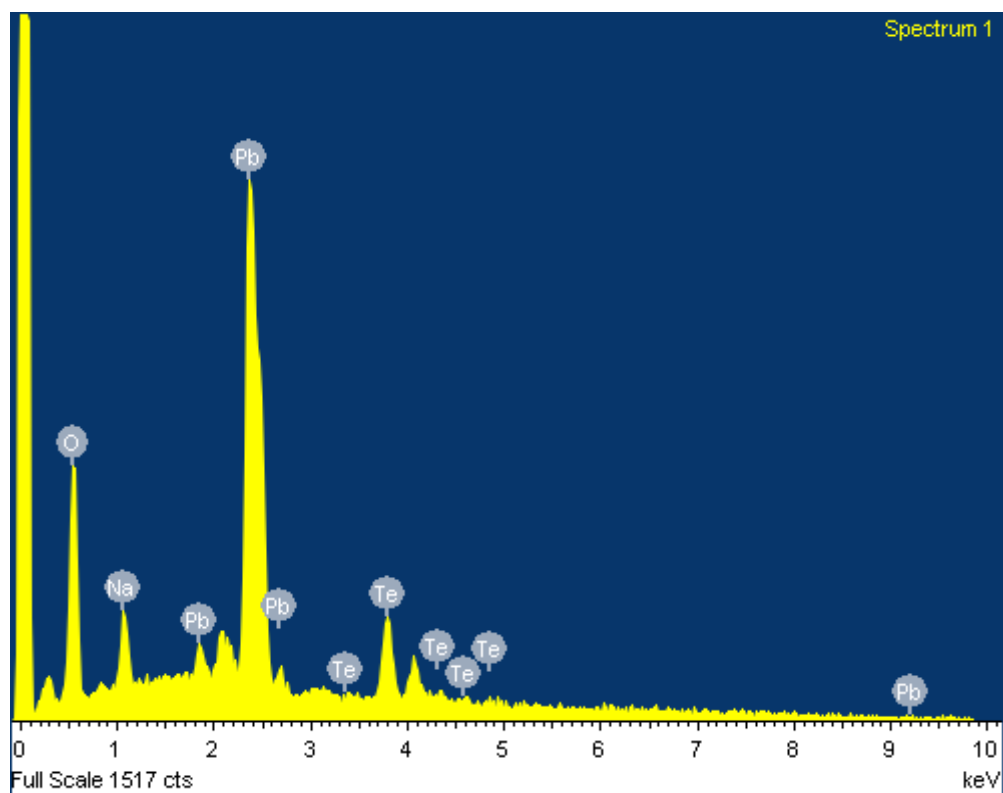

### EDS

| Spectrum   | O     | Na   | Te   | Pb    |
|------------|-------|------|------|-------|
| Spectrum 1 | 70.53 | 7.96 | 6.68 | 14.82 |
| Spectrum 2 | 74.59 | 8.22 | 5.77 | 11.41 |
| Mean       | 72.56 | 8.09 | 6.23 | 13.12 |

Atomic%

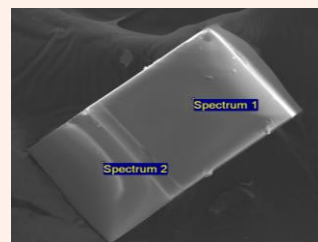

Figure S3. Energy dispersive X-ray spectroscopy analysis on a crystal of  $\text{Na}_2\text{Pb}_9(\mu_6\text{-O})_2(\text{Te}_2\text{O}_{10})_2$

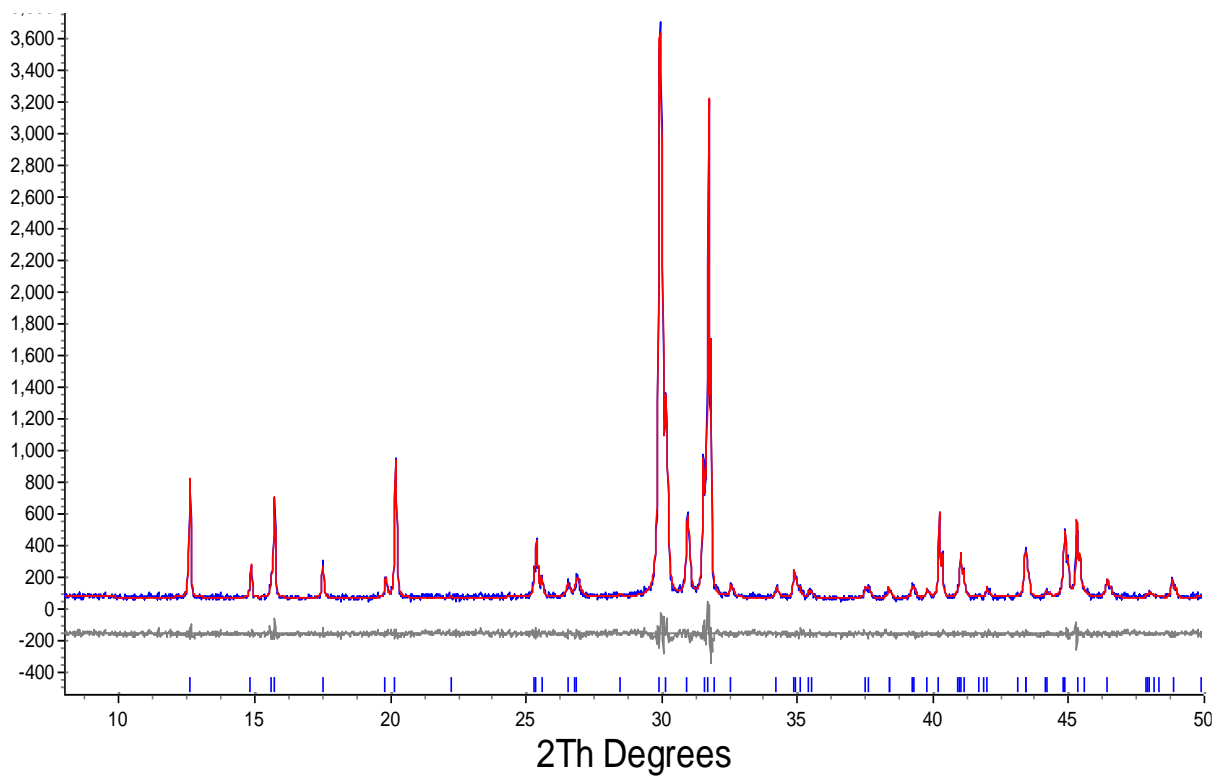

| All range dependent    |  | Rwps  | Path | Display | Rpt/Text |
|------------------------|--|-------|------|---------|----------|
|                        |  | Value |      |         |          |
| GOF                    |  | 1.23  |      |         |          |
| Rexp                   |  | 8.37  |      |         |          |
| Rwp                    |  | 10.25 |      |         |          |
| Rp                     |  | 7.66  |      |         |          |
| Rexp-dash              |  | 9.49  |      |         |          |
| Rwp-dash               |  | 11.62 |      |         |          |
| Rp-dash                |  | 9.02  |      |         |          |
| Weighted Durbin Watson |  | 1.63  |      |         |          |

Figure S4. Pawley fit of the powder diffraction data to the structure of  $\text{Na}_2\text{Pb}_9(\mu_6\text{-O})_2(\text{Te}_2\text{O}_{10})_2$ .

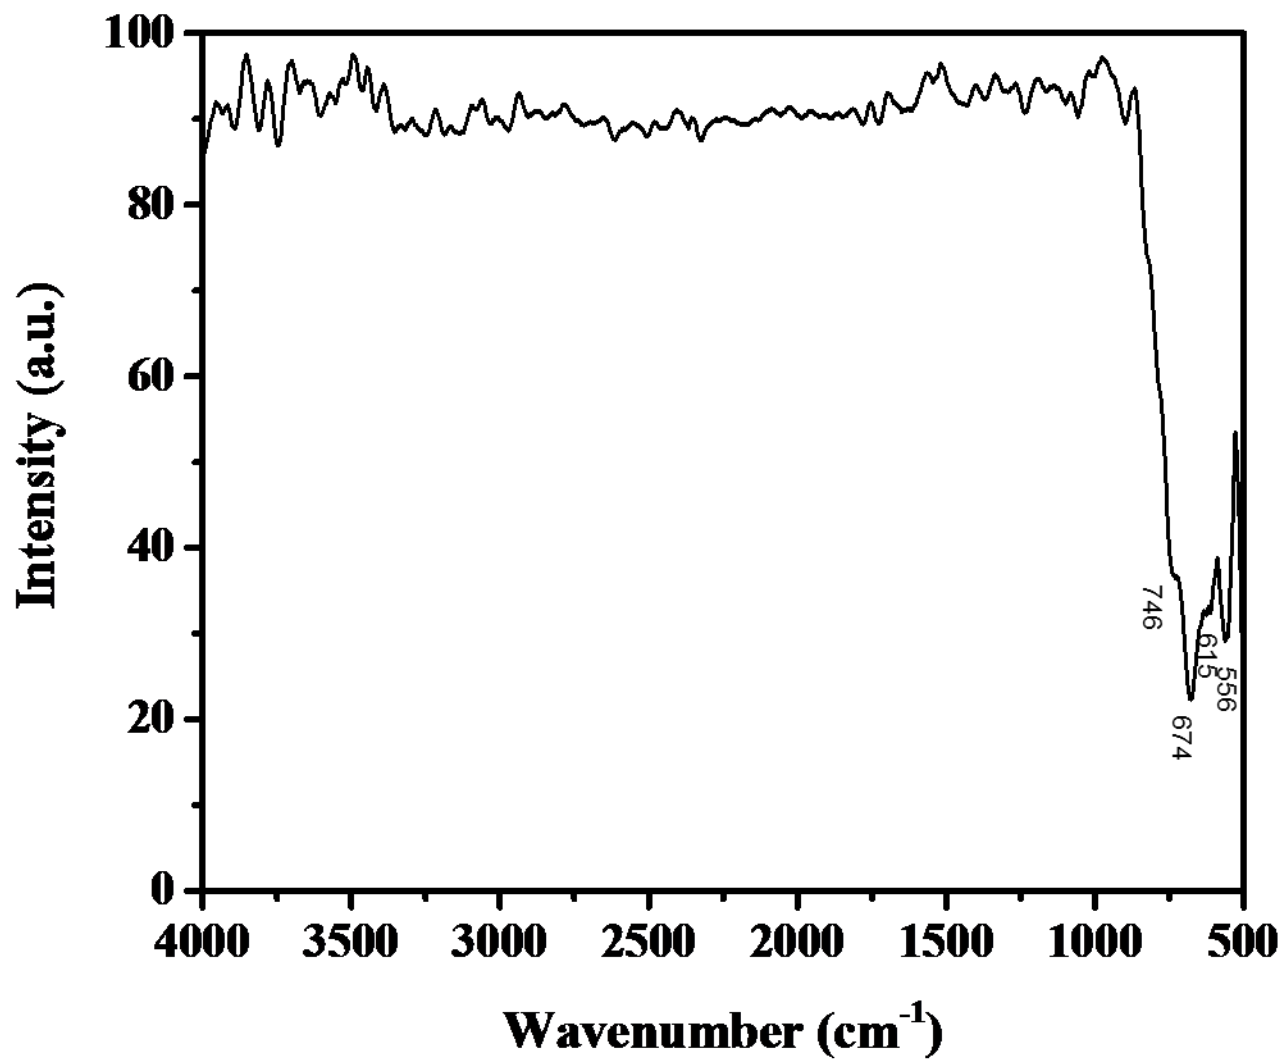

Figure S5. The infrared spectrum of Ba<sub>3</sub>PbTe<sub>6</sub>O<sub>16</sub> (KBr method).

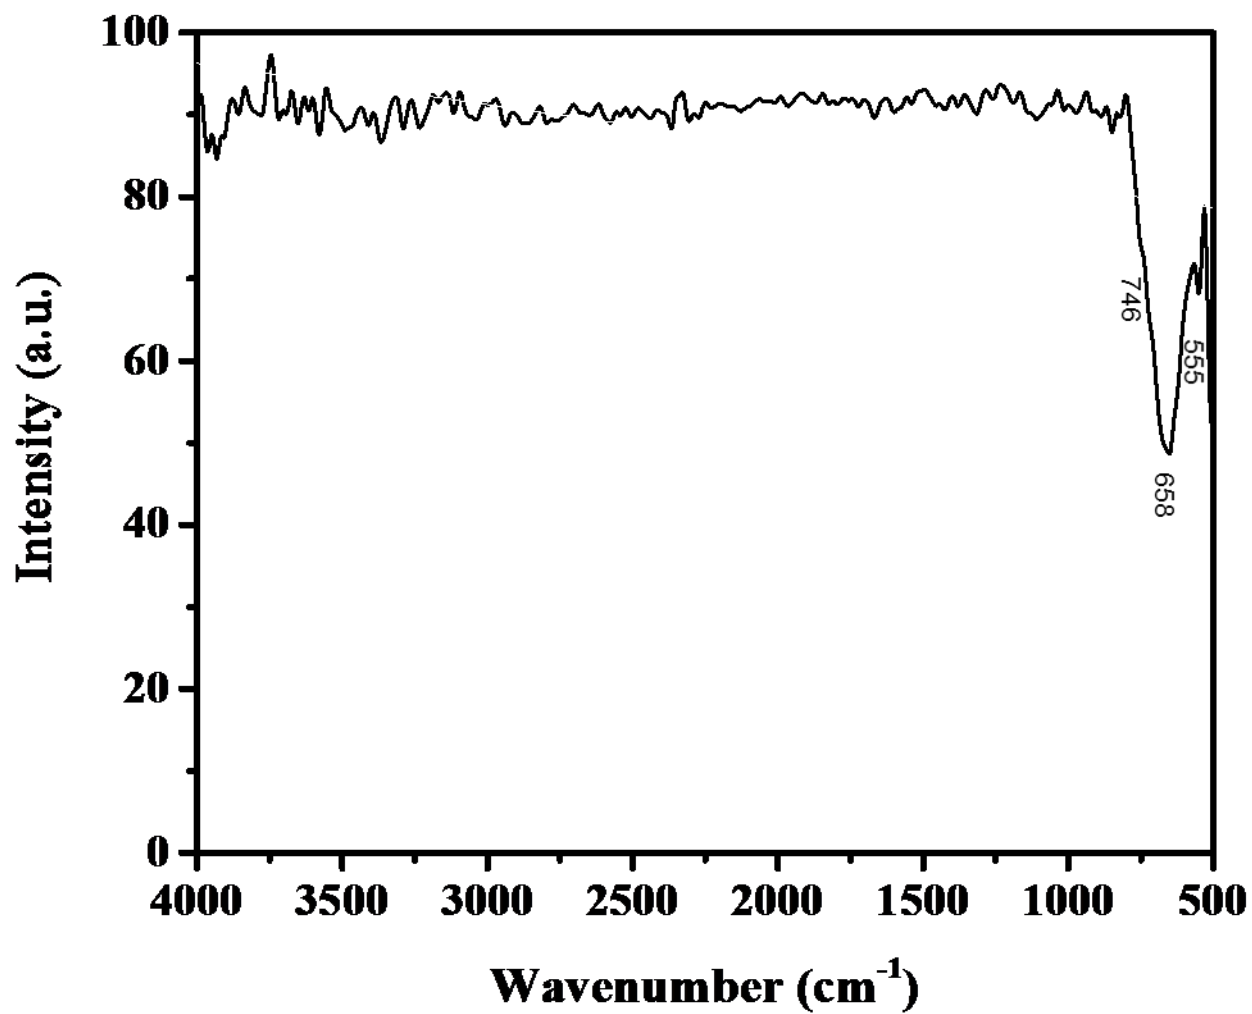

Figure S6. The infrared spectrum of  $\text{Na}_2\text{Pb}_9(\mu_6\text{-O})_2(\text{Te}_2\text{O}_{10})_2$  (KBr method).
